# Supplementary material for: Randomized phase II trial of MRI-guided salvage radiotherapy for prostate cancer in 4 weeks versus 2 weeks (SHORTER)
Source: Springer Nature journal article supplement (doi:10.1186/s12885-023-11278-3), 2023-08-22
Supplement: MOESM1 [file 25948712]

**Supplemental Table 1.** Radiotherapy Treatment Constraints and Planning Parameters

| <b>5 FRACTION ARM</b> |                             |                     |
|-----------------------|-----------------------------|---------------------|
| <b>Structure</b>      | <b>Dosimetric Parameter</b> | <b>Per Protocol</b> |
| Rectum                | V25                         | < 20 cc             |
|                       | Max Point Dose              | < 38 Gy             |
| Bladder Wall          | V18.3                       | <15 cc              |
|                       | V25                         | < 18 cc             |
| Femoral Heads         | Max Point Dose              | < 38 Gy             |
|                       | V30                         | < 10 cc             |

  

| <b>20 FRACTION ARM</b> |                             |                     |
|------------------------|-----------------------------|---------------------|
| <b>Structure</b>       | <b>Dosimetric Parameter</b> | <b>Per Protocol</b> |
| Rectum                 | V24                         | < 80 cc             |
|                        | V32                         | < 70 cc             |
|                        | V40                         | < 60 cc             |
|                        | V48                         | < 50 cc             |
|                        | V55                         | < 40 cc             |
| Bladder Wall           | V40                         | < 80 cc             |
|                        | V48                         | < 50 cc             |
| Femoral Heads          | D44 Gy[%]                   | < 10                |
